# Supplementary material for: Direction-dependent arm kinematics reveal optimal integration of gravity cues
Source: eLife journal article supplement (doi:10.7554/elife.16394), 2016-11-02
Supplement: supp [file elife-16394-supp-v1.zip]

**A****Moment of the weight**

$$\vec{M}(\vec{W}) = \vec{O}\vec{W} \times m\vec{g}$$

$$\vec{M}(\vec{W}) = \begin{pmatrix} -mgl \sin \theta \cos \gamma \\ mgl \cos \theta \\ 0 \end{pmatrix}$$

**Unit vector normal to the plane of motion**

$$\vec{w} = \vec{u} \times \vec{O}\vec{W} / \|\vec{u} \times \vec{O}\vec{W}\|$$

$$\vec{w} = \begin{pmatrix} 0 \\ \sin \gamma \\ \cos \gamma \end{pmatrix}$$

**Spherical coordinates of W**

$$\vec{O}\vec{W} = \begin{pmatrix} -l \cos \theta \\ l \sin \theta \cos \gamma \\ l \sin \theta \sin \gamma \end{pmatrix}$$

**Moment of the weight normal to the plane of motion**

$$\vec{M}(\vec{W}) \cdot \vec{w} = mgl \cos \theta \sin \gamma$$

gravitational torque during  
oblique planar motion

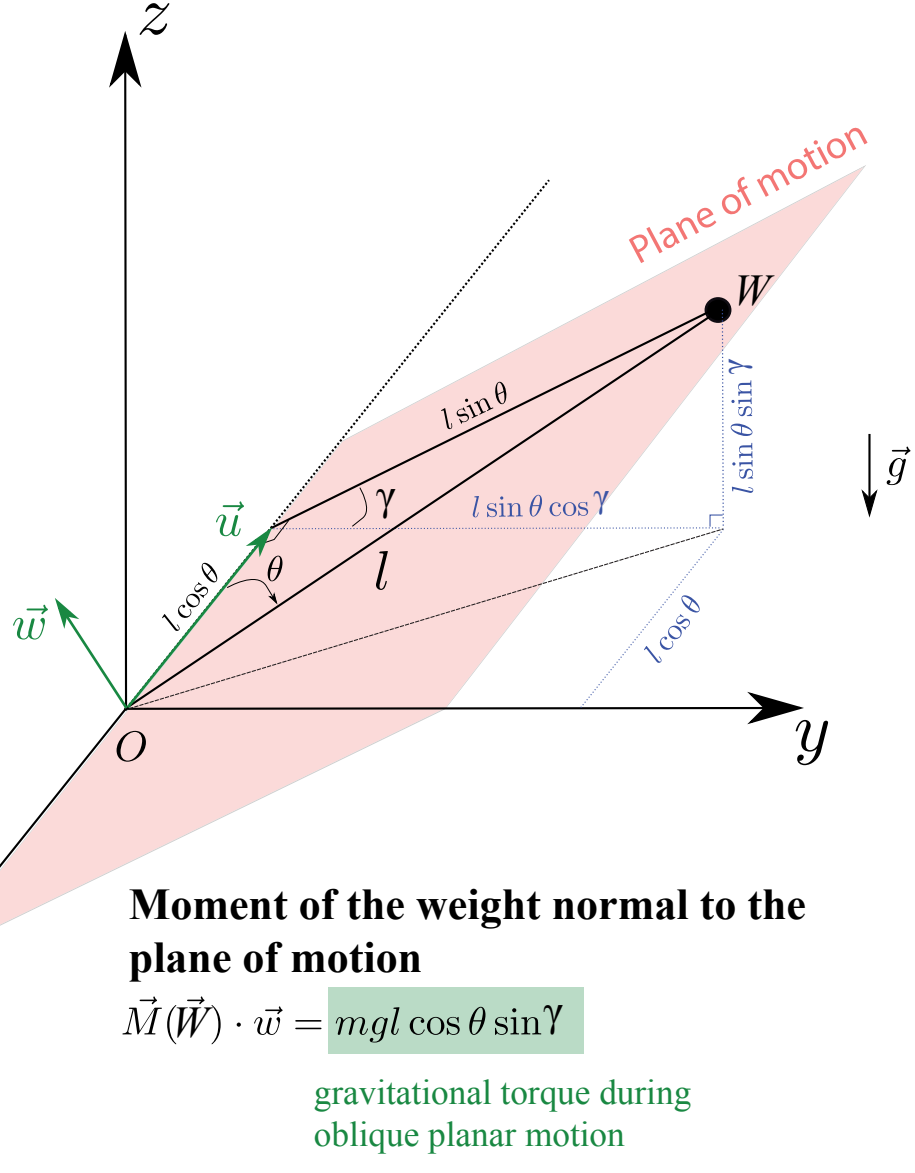**B**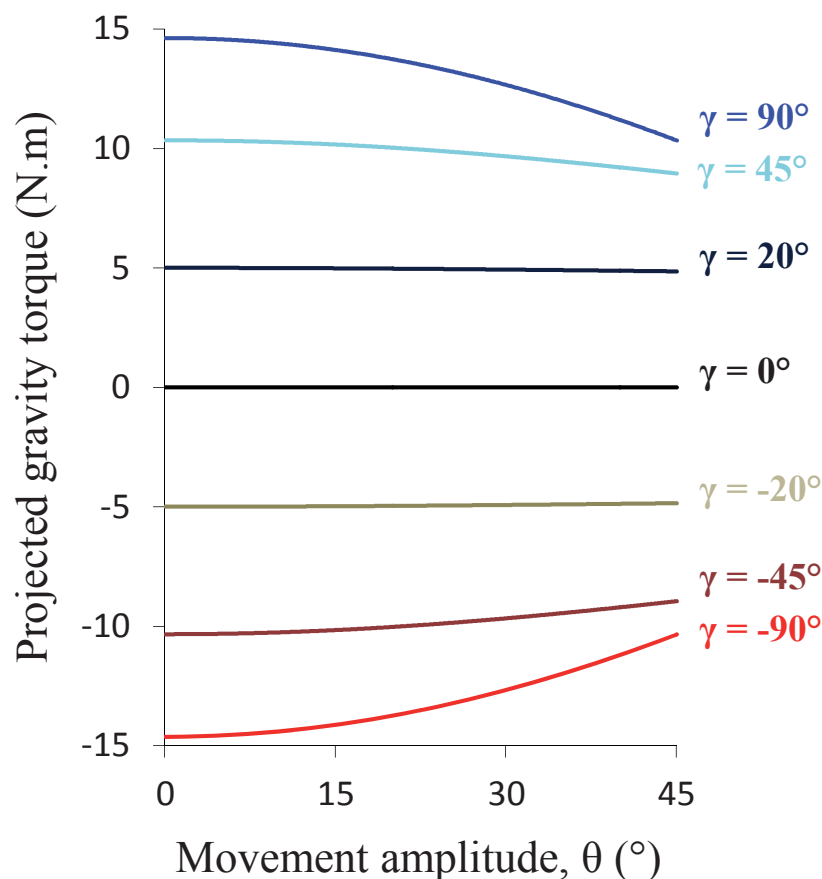**C****Experiment 1 setup**

| Target         | Plane ( $\gamma$ ) | Flexion          | Extension        | Abduction        |
|----------------|--------------------|------------------|------------------|------------------|
| 0 $^{\circ}$   | 90 $^{\circ}$      | -                | 45 $^{\circ}$    | -                |
| 15 $^{\circ}$  | 75 $^{\circ}$      | -                | 43.07 $^{\circ}$ | 14.51 $^{\circ}$ |
| 30 $^{\circ}$  | 60 $^{\circ}$      | -                | 37.76 $^{\circ}$ | 26.57 $^{\circ}$ |
| 45 $^{\circ}$  | 45 $^{\circ}$      | -                | 30 $^{\circ}$    | 35.26 $^{\circ}$ |
| 60 $^{\circ}$  | 30 $^{\circ}$      | -                | 20.70 $^{\circ}$ | 40.89 $^{\circ}$ |
| 70 $^{\circ}$  | 20 $^{\circ}$      | -                | 14 $^{\circ}$    | 43.22 $^{\circ}$ |
| 80 $^{\circ}$  | 10 $^{\circ}$      | -                | 7.05 $^{\circ}$  | 44.56 $^{\circ}$ |
| 85 $^{\circ}$  | 5 $^{\circ}$       | -                | 3.53 $^{\circ}$  | 44.89 $^{\circ}$ |
| 90 $^{\circ}$  | 0 $^{\circ}$       | -                | -                | 45 $^{\circ}$    |
| 95 $^{\circ}$  | -5 $^{\circ}$      | 3.53 $^{\circ}$  | -                | 44.89 $^{\circ}$ |
| 100 $^{\circ}$ | -10 $^{\circ}$     | 7.05 $^{\circ}$  | -                | 44.56 $^{\circ}$ |
| 110 $^{\circ}$ | -20 $^{\circ}$     | 14 $^{\circ}$    | -                | 43.22 $^{\circ}$ |
| 120 $^{\circ}$ | -30 $^{\circ}$     | 20.70 $^{\circ}$ | -                | 40.89 $^{\circ}$ |
| 135 $^{\circ}$ | -45 $^{\circ}$     | 30 $^{\circ}$    | -                | 35.26 $^{\circ}$ |
| 150 $^{\circ}$ | -60 $^{\circ}$     | 37.76 $^{\circ}$ | -                | 26.57 $^{\circ}$ |
| 165 $^{\circ}$ | -75 $^{\circ}$     | 43.07 $^{\circ}$ | -                | 14.51 $^{\circ}$ |
| 180 $^{\circ}$ | -90 $^{\circ}$     | 45 $^{\circ}$    | -                | -                |
