# Supplementary figures and images for: Direction-dependent arm kinematics reveal optimal integration of gravity cues
Source: eLife journal article supplement (doi:10.7554/elife.16394), 2016-11-02

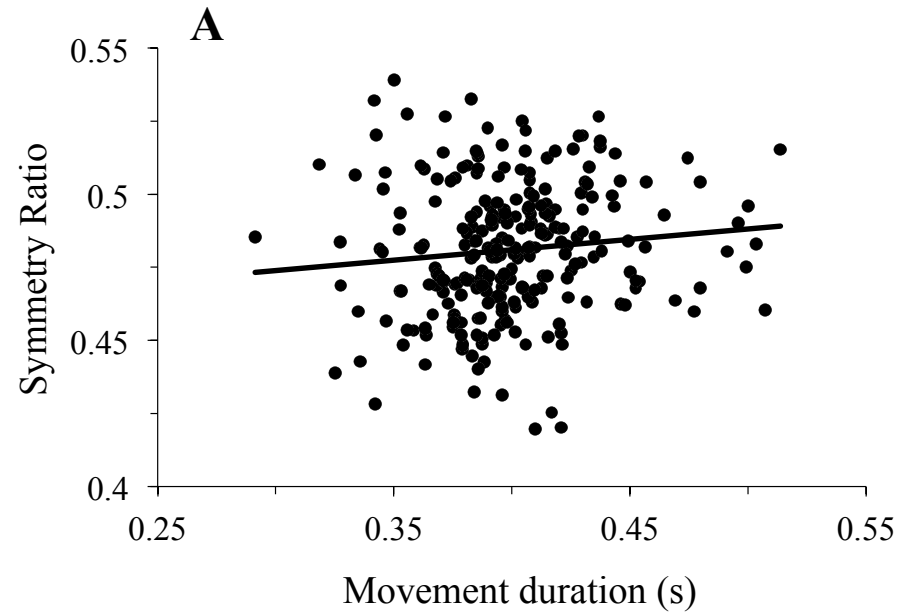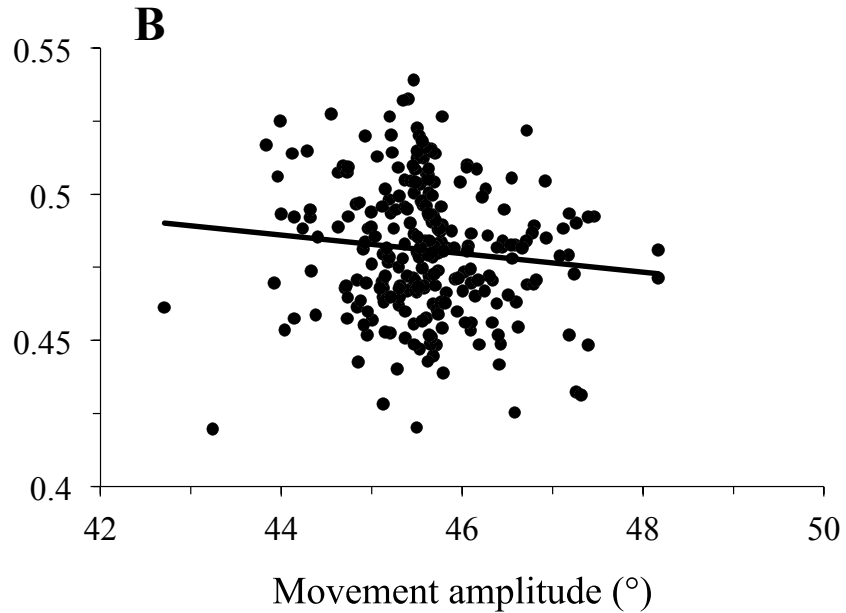

Supplement: supp [file elife-16394-supp-v1.zip]

Symmetry Ratio  
Down - Up

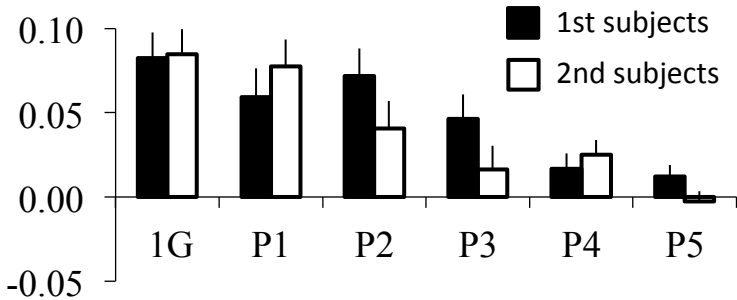

Supplement: supp [file elife-16394-supp-v1.zip]

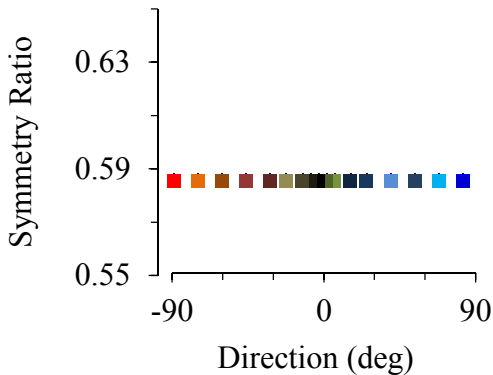

Supplement: supp [file elife-16394-supp-v1.zip]

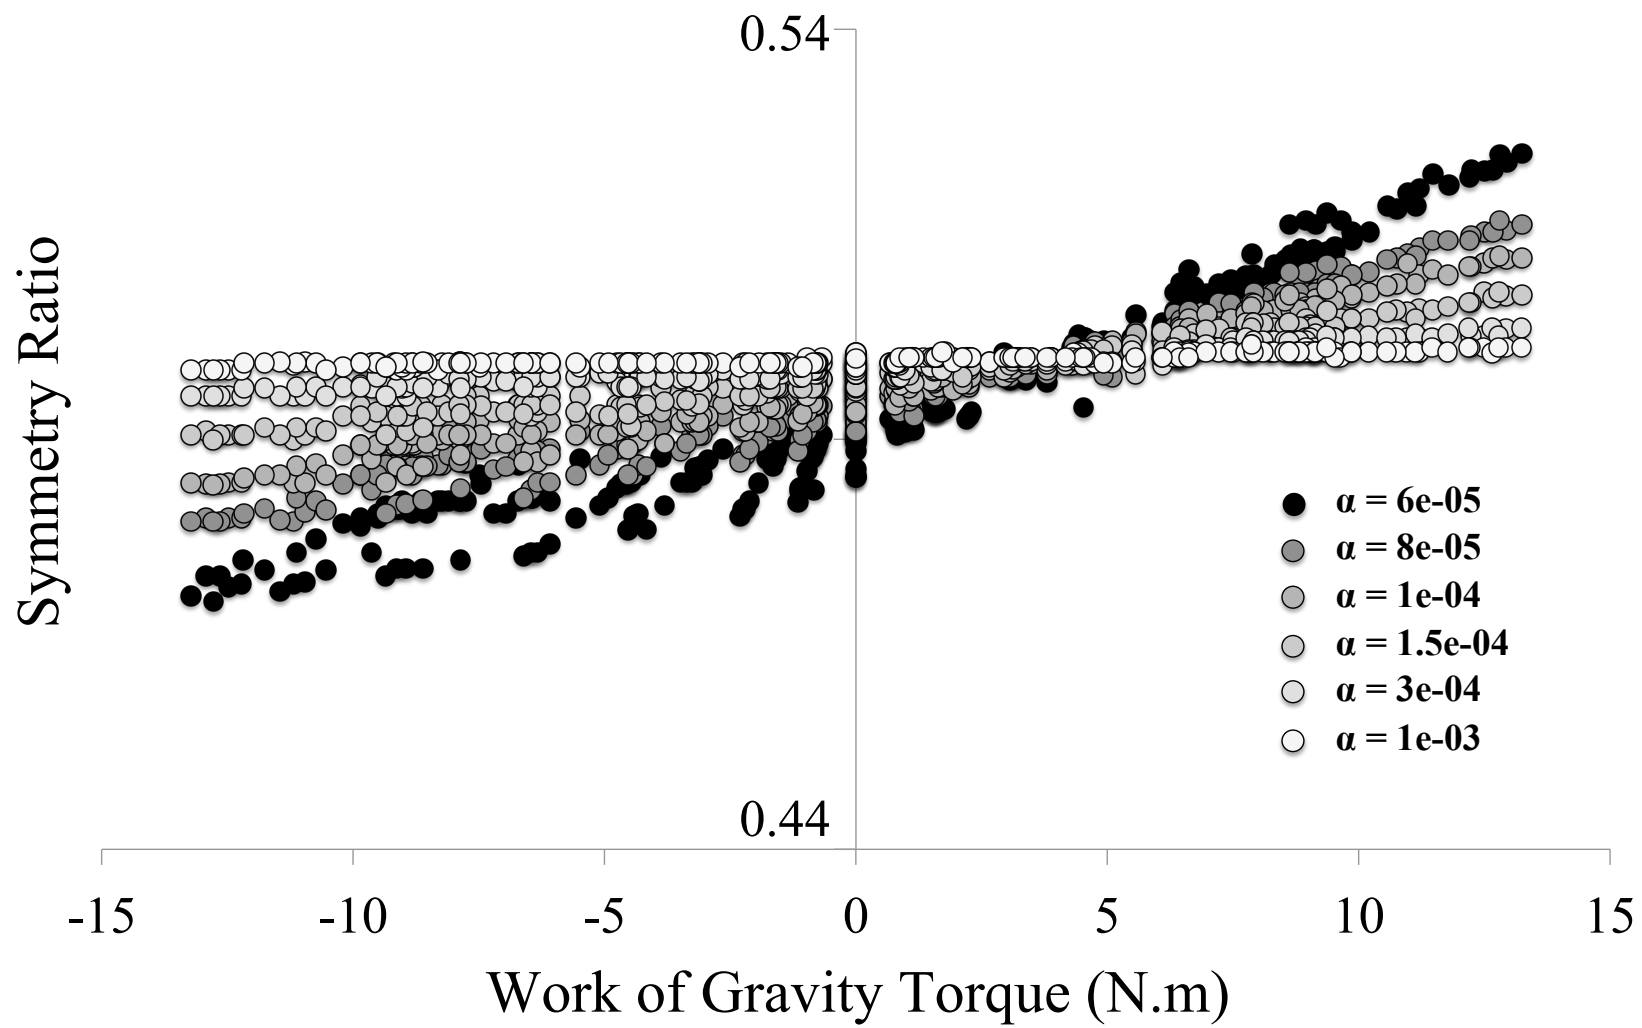

Supplement: supp [file elife-16394-supp-v1.zip]
